# Supplementary material for: MicroRNAs down-regulate homologous recombination in the G1 phase of cycling cells to maintain genomic stability
Source: eLife journal article supplement (doi:10.7554/elife.02445), 2014-04-30
Supplement: supp [file elife_poa_e02445_Figure_4_figure_supplement_1.pdf › elife_poa_e02445_Figure_4_figure_supplement_1.pdf]

## miR-1255b MREs

## BRCA1 MRE1

Homo sapiens AAGAT--GAAGT--TTCTATCA-----TCCA-----  
 Pan troglodytes AAGAT--GAAGT--TTCTATCA-----TCCA-----  
 Mus musculus AGGAG--GAAGTC--TTCTATCAGGTGTGCTCTTCCA-----  
 Caenorhabditis elegans GAGATGAGAAGTGGGTGCTCTATG--TTAACCATTCCATTCCA  
 ..\*\* \*\*\*\*\* \* \*\*.,.:

## BRCA1 MRE2

Homo sapiens ACCT--ACATCAG-----GCCT-----TCATCCT  
 Pan troglodytes AGCT--ACATCAG-----GCCT-----TCATCCT  
 Mus musculus ACCT--TCATCAGGTGCTCA--CAACAGCCTGTAGTTTCAGGGAATCTGACACCCT  
 Caenorhabditis elegans ACCAAATCGCCGAGTGCTTCATGAACCTCAGACTTGTGCTTT-----CCAACT  
 \* \*: ;\*. \*.. \*..\*\* \*\* \*\*

## BRCA1 MRE3

Homo sapiens CCAGGAGTG-----GAAAG-----GT-----CATCCC  
 Pan troglodytes CCAGGAGTG-----GAAAG-----GTA-----AGAAACATCCC  
 Mus musculus CCTGAAGAGTTT-----TAAAAATACAGAAAG-----GTGG-----TCTTCACTCTGCCATCCC  
 Caenorhabditis elegans CCATAAGTTTGTGACTTTTTTTCAAATATTTTCCAAAACCTCTAGAAAGTTTAAATTTTTCATCGTAGTGTGTCACGGTGGGTGCTGCC  
 \*\*: .\*: \*\*\*\*\* \*\* \*

## BRCA2 MRE1

Homo sapiens -CA-----ATCAACAAAAT-----GGTCATCCA-  
 Pan troglodytes -CAGAAGATTTCATAGTTAATTTTTTTTCAACAAAAT-----GGTCATCCAA  
 Mus musculus CCAG-----CAACCACATGGTGGCTCACAATCATCCA-  
 Caenorhabditis elegans CCAC-----CAGCAAAAAA-----AATCAACCA-  
 \*\* \*\*.,\*.,\*.: .,\*\*\*:\*\*\*

## miR-193b\* MREs

## BRCA1 MRE4

Homo sapiens AGTGTG--CAGCAT-----TTGAAAA-----CCC  
 Pan troglodytes AGTGTG--CAGCAT-----TTGAAAA-----CCC  
 Mus musculus AGTGTGACTCAGCATAGATTCTCGATGCCCCACGTGTTCCGCCATTGAAAGGCAAGGCAAGCTTTGCTGCC  
 Caenorhabditis elegans AGTGGT--CAATGCAATATG-----ATGGATTACGGGAATAAAAA-----CCC  
 \*\*\*\* .:\*\*\*: :\*,\*\*\*\*

## BRCA1 MRE5

Homo sapiens G---CAAGATCTAG-----AGG-----GAACC-CCT  
 Pan troglodytes ---ACCAGAACTTTGTAATTCACATTCATCGTTGTGTAAATTAAACTTCTCCCATTCCTTTGAGAGGGGAACCCCT  
 Mus musculus G---CAAGCTCTAG-----GACAGG-ACTAT---ATAG--AGATAC-CCT  
 Caenorhabditis elegans GTTCTCAAGATCTTGAAAAACATAAAA-----ATTATGACAGCTTCTGA---ATCGCTGGAACCTCCT  
 \*,\*.,\*:; :

## BRCA1 MRE6

Homo sapiens CTG--GCCA-----ACATGGTG-----AAACCCC  
 Pan troglodytes CTG--GCCA-----ACATGGTG-----AAACCCC  
 Mus musculus CTG--GCCAGTGATCCTCTGGTCTTAACATGGCGTCTGCTTCTCCAACTGTGTAACCCC  
 Caenorhabditis elegans CTGTAAGATCCCGGTGAAAGTGGTCAATGCAATATGATGG--ATTACGGGAATAAAAAACCC  
 \*\*\* \* .. .\*: . \*

## BRCA2 MRE2

Homo sapiens ---TAA-----AAATAG-----T-----CATAT-----AACCCCT  
 Pan troglodytes ---TAA-----AAATAG-----T-----CATAT-----AACCCCT  
 Mus musculus TAAAAAAGTTTATTTTATGAGTATAAGTGTTTTTCCTGCTTTGCACCATATGCAGCCAGTTCCCTCTGAGGCCAGAGAGGGAATTGGATCCCT  
 Caenorhabditis elegans ---TGA-----CAATTG-----GTTCCGATT-----CAAAG-----ACCCCA  
 \*,\* ..:\*,\* \* \*\* \*

## RAD51 MRE1

Homo sapiens TTG-----GCC-----AAGG-----TGGTGA-----AAT-----CCC-  
 Pan troglodytes TTG-----GCC-----AAGG-----TGGTGA-----AAT-----CCC-  
 Mus musculus TTGGCTGTACATGCCAGGTGAGTTGCTAGGGTTTCGGGCTGATCAGATCAGCAAGTAGCTATGAGCTTCTTGGGTTGCTAGGAATGAAACCCC  
 Caenorhabditis elegans TTGTGT--CAATTGCCGATTGATATGGGAGG-----TGGTGAGG--GAAAAATG--TATGTATATTGATACCAATGCCACTTTT--CGACCCC-  
 \*\*\* \*\* \*

## miR-148b\* MREs

## RAD51 MRE2

Homo sapiens TC-TTATGTTTCCAAG-----AGAACTA  
 Pan troglodytes TC-TTATGTTTCCAAG-----AGAACTA  
 Mus musculus TC-TTATGTATCCAGGTTATCCTGAAACTCTTGATAATTCCTCTCGCTCTGGTGTGGTTAGATTATGATGCGTTATCATGCCTGCCTTGTGTTGAAACACTCTTAGACCTA  
 Caenorhabditis elegans TCGTTATGCTGTGTGATTGTTG-----ACTGTGCAACTGCTCATTTCCG-----TAACGAATGCACTGGAAGAGG-----AGATCTA  
 \*\* \*\*\*\*\* : ;\*

## RAD51 MRE3

Homo sapiens TC-TTATGTTTCCAAG-----AGAACTA  
 Pan troglodytes TC-TTATGTTTCCAAG-----AGAACTA  
 Mus musculus TC-TTATGTATCCAGGTTATCCTGAAACTCTTGATAATTCCTCTCGCTCTGGTGTGGTTAGATTATGATGCGTTATCATGCCTGCCTTGTGTTGAAACACTCTTAGACCTA  
 Caenorhabditis elegans TCGTTATGCTGTGTGATTGTTG-----ACTGTGCAACTGCTCATTTCCG-----TAACGAATGCACTGGAAGAGG-----AGATCTA  
 \*\* \*\*\*\*\* : ;\*
