# Supplementary figures and images for: MicroRNAs down-regulate homologous recombination in the G1 phase of cycling cells to maintain genomic stability
Source: eLife journal article supplement (doi:10.7554/elife.02445), 2014-04-30

**Figure 1-figure supplement 1**

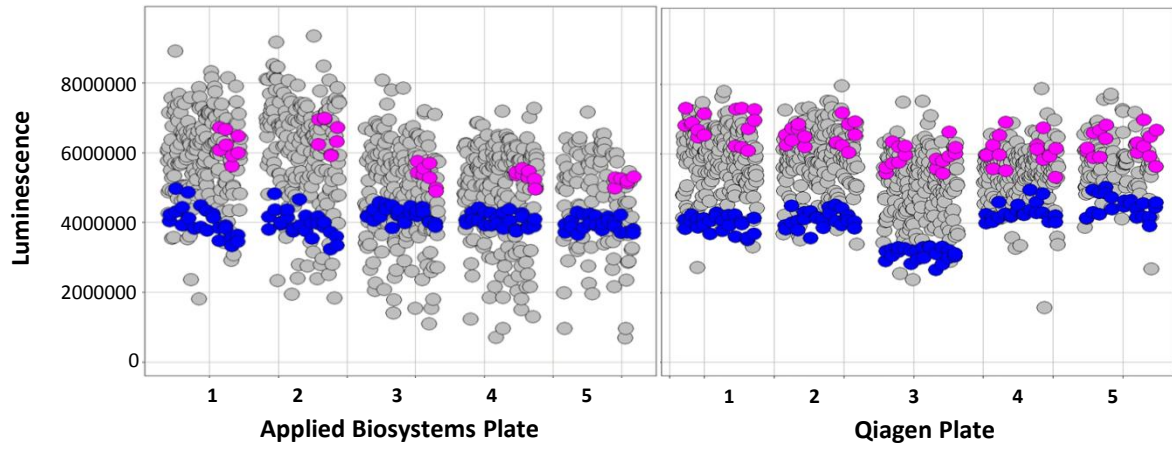

Supplement: supp [file elife_poa_e02445_Figure_1_figure_supplement_1.pdf › elife_poa_e02445_Figure_1_figure_supplement_1.pdf]

**Figure 3-figure supplement 1**

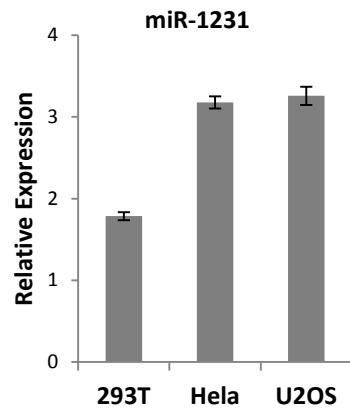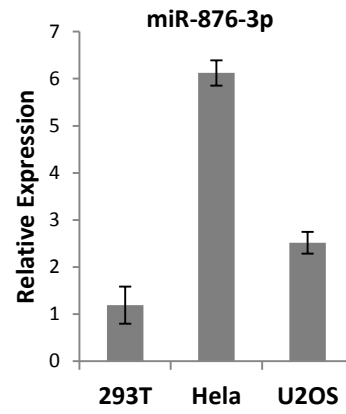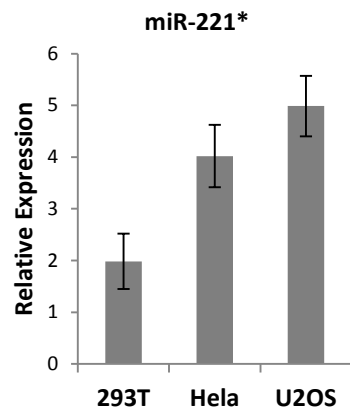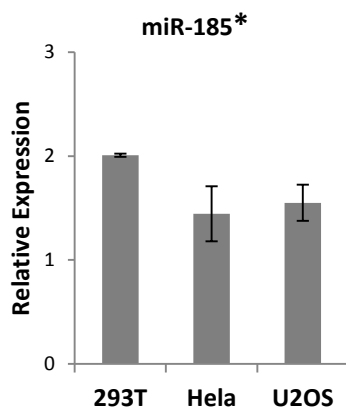

Supplement: supp [file elife_poa_e02445_Figure_3_figure_supplement_1.pdf › elife_poa_e02445_Figure_3_figure_supplement_1.pdf]

Figure 3-figure supplement 2

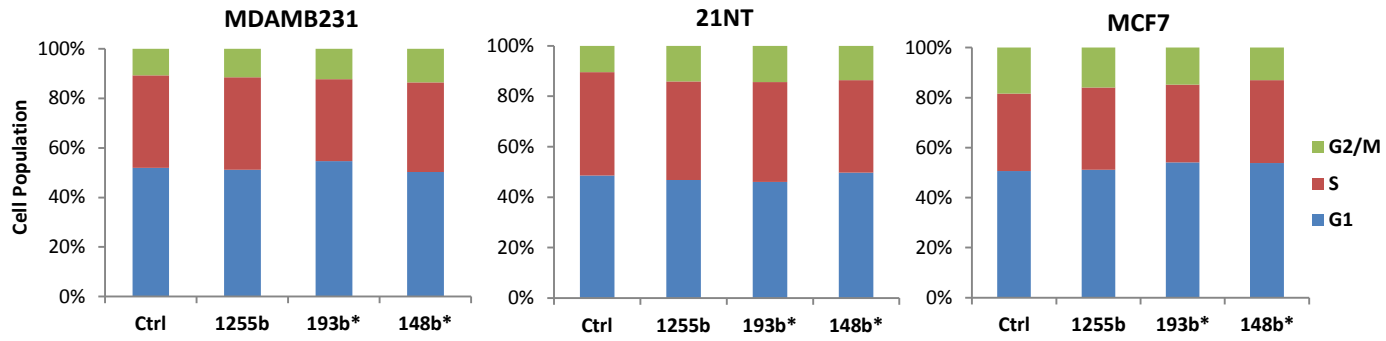

Supplement: supp [file elife_poa_e02445_Figure_3_figure_supplement_2.pdf › elife_poa_e02445_Figure_3_figure_supplement_2.pdf]

**Figure 5-figure supplement 1**

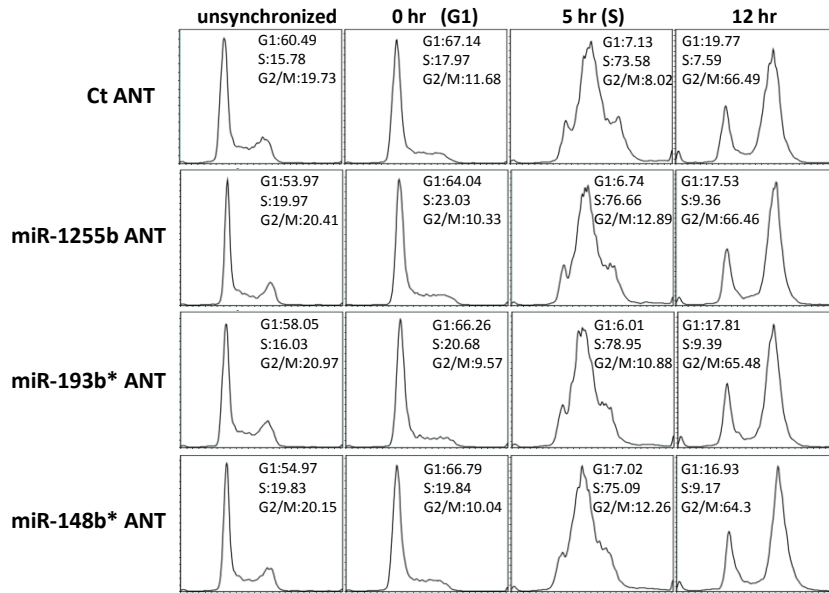

Supplement: supp [file elife_poa_e02445_Figure_5_figure_supplement_1.pdf › elife_poa_e02445_Figure_5_figure_supplement_1.pdf]

**Figure 6-figure supplement 1**

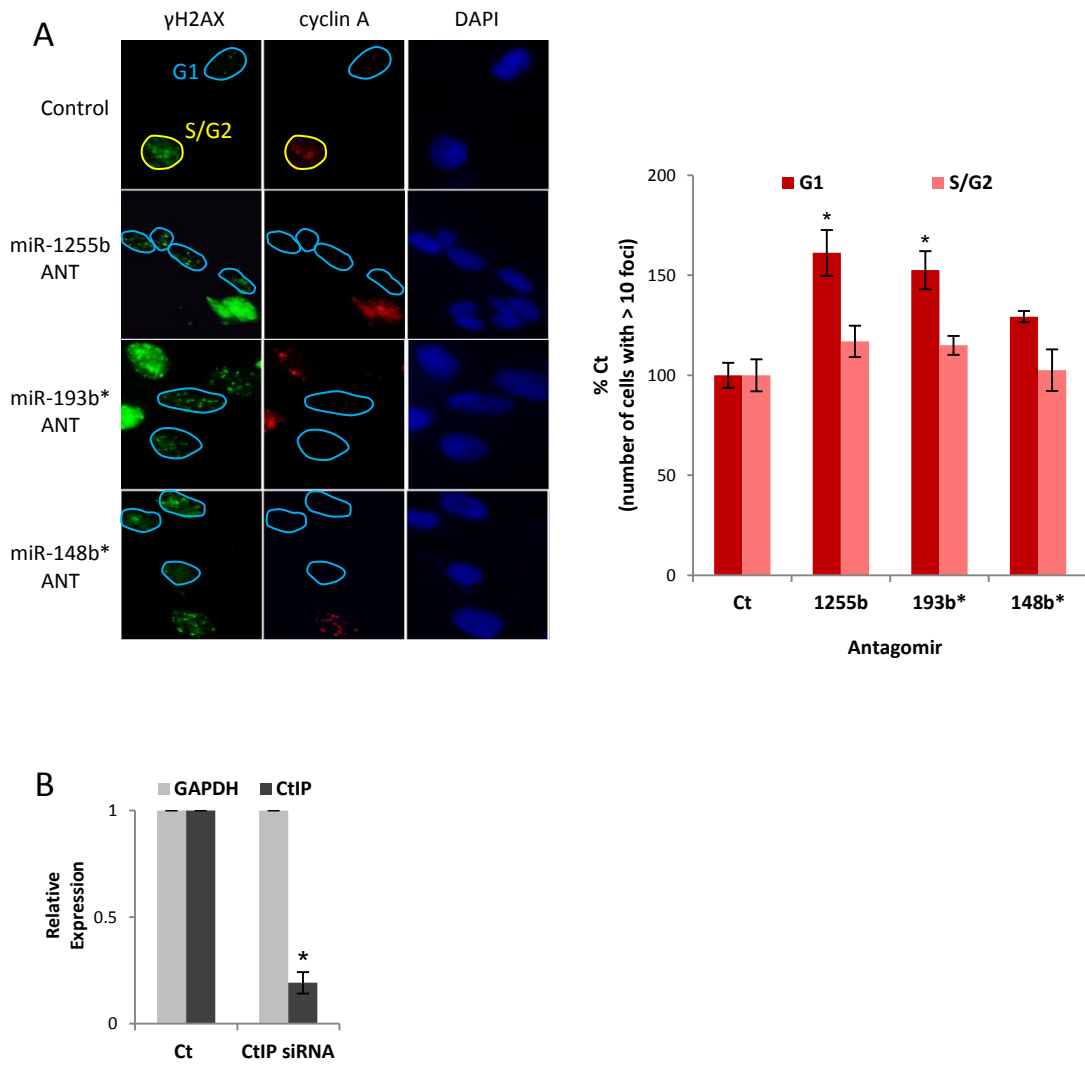

Supplement: supp [file elife_poa_e02445_Figure_6_figure_supplement_1.pdf › elife_poa_e02445_Figure_6_figure_supplement_1.pdf]
